# Supplementary material for: Dalteparin versus Unfractionated Heparin in Critically Ill Patients
Source: Atypon-hosted journal article supplement (doi:10.1056/nejmoa1014475), 2011-03-22

## Supplementary Appendix

This appendix has been provided by the authors to give readers additional information about their work.

Supplement to: The PROTECT Investigators for the Canadian Critical Care Trials Group and the Australian and New Zealand Intensive Care Society Clinical Trials Group. Dalteparin versus unfractionated heparin in critically ill patients. *N Engl J Med* 2011;364:1305-14. DOI: 10.1056/NEJMoa1014475.

**Dalteparin versus Unfractionated Heparin in**

**Critically Ill Patients**

**Supplementary Appendix**

The PROTECT Investigators

for the Canadian Critical Care Trials Group

& the Australian and New Zealand Intensive Care Society Clinical Trials Group

## TABLE OF CONTENTS

|                                                                     |                |
|---------------------------------------------------------------------|----------------|
| <b>PROTECT Collaborators</b>                                        | <b>Page 3</b>  |
| <b>Trial Management and Oversight</b>                               | <b>Page 10</b> |
| <b>Diagnosis of Pulmonary Embolism</b>                              | <b>Page 11</b> |
| <b>Bleeding Definitions</b>                                         | <b>Page 13</b> |
| <b>Serious Adverse Events</b>                                       | <b>Page 14</b> |
| <b>Appendix Table 1: VTE Outcomes (Per-Protocol Analysis)</b>       | <b>Page 15</b> |
| <b>Appendix Table 2: Subgroup Analyses</b>                          | <b>Page 16</b> |
| <b>Appendix Figure 1: CONSORT Diagram</b>                           | <b>Page 17</b> |
| <b>Appendix Figure 2: Kaplan-Meier Curves for PE</b>                | <b>Page 19</b> |
| <b>Appendix Figure 3: Kaplan-Meier Curves for Any VTE</b>           | <b>Page 20</b> |
| <b>Appendix Figure 4: Numbers of Proximal Leg DVTs by Study Day</b> | <b>Page 21</b> |
| <b>Appendix Figure 5: Numbers of PEs by Study Day</b>               | <b>Page 22</b> |
| <b>Appendix Figure 6: Numbers of VTEs by Study Day</b>              | <b>Page 23</b> |

## **PROTECT Collaborators**

### **Clinical Collaborators:**

#### **Canadian Investigators**

- Dr Deborah Cook (Lead), Ellen McDonald, Andrea Tkaczyk, France Clarke; Pharmacist Christine Wallace; St Joseph's Healthcare, Hamilton
- Drs Rick Hall & Graeme Rocker, Lisa Julien, Debbie Wright, Caroline Roy, Judy Theriault, Susan Pleasance; Pharmacy Technicians Debi Snow & Shannon Herbert; Capital Health Queen Elizabeth II Health Science Center, Halifax
- Dr Maureen Meade, Lori Hand; Pharmacy Technician Maya Biljan; Hamilton Health Sciences, Hamilton General Hospital, Hamilton
- Dr Andreas Freitag, Christine Wynne, Mark Duffett, Michelle Kho, Nicole Zytaruk; Pharmacy Technician Karen Currie; Hamilton Health Sciences, McMaster Hospital, Hamilton
- Dr John Granton, Andrea Matte, Paulina Farias, Leslie Chu, Nancy Brockest, Stephanie Go, Margaret McGrath-Chong, Madison Dennis, Marc Lipkus, Emily Stern, Ryan Albert; Pharmacy Ron Seto, Muhammad Zuberi, Jie Ming & Laura Arus-Pampin, Muhammad Walid, Robert Solek, Kim De Freitas; University Health Network, Toronto General Hospital, Toronto
- Drs Stephan Langevin, Francois Lauzier & Alexis F Turgeon, Martine Blais, Maxime Beauparlant, Julie Asselin, Caroline Roy, Chantal Gagne, Marie Thibodeau; Pharmacists Anik Rioux, Tuong-Vi Tran; Hôpital de l'Enfant-Jésus, Quebec City
- Dr Germain Poirier, Isabelle Neas, Sandrine Spearson; Pharmacist Betty Ton; Charles LeMoyné Hospital, Montreal
- Drs Lauralyn McIntyre & Paul Hébert, Irene Watpool, Tracy McArdle, Claude Gaudert, Paule Marchand, Carson Davidson; Pharmacists Anne-Marie Dugal & Susan Fetzer; Ottawa Hospital, General Campus, Ottawa
- Dr Joe Pagliarello, Mary-Jo Lewis, Erin Murphy, Julia Foxall; Pharmacist Sherry Weir; Ottawa Hospital Civic Campus, Ottawa
- Dr Yoanna Skrobik, Johanne Harvey, Stefania Chitu; Pharmacists Marceline Quach & Linda Pinet; Maisonneuve Rosemont Hospital, Montreal
- Dr Martin Albert, Carole Sirois, Carole Nadon, Stephanie Dolle, Audrey-Anne Gosselin, Patrice Deroy; Pharmacists Anne Julie Frenette & David Williamson; Hôpital du Sacré-Coeur de Montréal, Montreal
- Dr Sangeeta Mehta, Cheryl Ethier, Sam Tirgari, Lindsay Steinberg, Rod McDonald, Vidhya Sivanantham, Kristofer Bandayrel, Friederike Quittnat Pelletier, Marnie Kramer-Kile, Maedean Brown, Scott Kim; Pharmacist Holly Leung; Mount Sinai Hospital, Toronto
- Dr Robert Fowler, Nicole Marinoff, Karen Code, Boris Bojilov, Derek Parsotam; Pharmacist John Iazzetta; Sunnybrook Hospital, Toronto
- Dr John Marshall, Orla Smith, Beth Fry, Kerri Porretta, Yoon Lee, Jeanna Morrissey, Victoria Wen; Pharmacy Technicians Laura Parsons & Ann Kosinski; St Michael's Hospital, Toronto
- Dr John Muscedere, Susan Fleury, Nicole Godfrey, Sharlene Hammond, Elizabeth Mann, Monica Myers, Amber Robinson; Pharmacist Chris Grey; Kingston General Hospital, Kingston
- Drs Sean Keenan & Steven Reynolds, Miroslav Svetik, Mary Van Osch; Pharmacist Anne-Marie Liberman; Royal Columbian Hospital, Westminister
- Drs Dean Chittock & Vinay Dhingra, Maureen Gardner, Susan Logie, Denise Foster, Roger Autio, Dara Davies, Pia Ganz, Laurie Smith; Pharmacy: Jane Day, Kaldip Mattu and Judy Yip; Vancouver General Hospital, Vancouver
- Dr Peter Dodek, Betty Jean Ashley, Sheilagh Mans; Pharmacist Mara Pavan; St. Paul's Hospital, Vancouver
- Dr Chip Doig, Linda Knox, Crystal Wilson, Kevin Champagne; Pharmacist Angela Kayall Peters; Calgary University Foothills Hospital, Calgary
- Dr Niall Ferguson, Andrea Matte, James Stevenson, Joel Elman, Madison Dennis; Pharmacist Jenn Tung, Robert Solek, Kim De Freitas, Nga Pham; University Health Network, Toronto Western Hospital, Toronto

- Dr Jim Kutsogiannis, Patrica Thompson, Norine Whalen; Pharmacist Liz Helboe; Royal Alexandra Hospital, Edmonton
- Dr Francois Lellouche, Marie-Claude Ferland, Patrick Dussault, Caroline Jacob, Marie-Eve Morneau, Nancy Laberge; Pharmacist Nathalie Chateaufvert; Laval Hospital, Quebec City
- Dr Tim Karachi, Andrea Tkaczyk; Pharmacy Technician Diane Lourenco; Hamilton Health Sciences, Juravinski Hospital, Hamilton
- Dr Michael Jacka, Marleen Irwin, Carmen Chan, Leeca Sonnema, Kelly Marsh, Jennifer Maurer, Tamara Kreidl, Candice Varden, Carey Kinjerski; Pharmacist Noelle Carey; University of Alberta, Edmonton
- Dr Chip Doig, Linda Knox, Crystal Wilson, Kevin Champagne; Pharmacist Angela Kayall Peters; Calgary University Peter Lougheed Hospital, Calgary
- Dr Kosar Khwaja, Laura Banici, Carole Sirois, Lena Havell; Pharmacists Gilbert Matte & Kathleen Normandin; Montreal General Hospital, Montreal
- Dr Gordon Wood, Fiona Auld, Leslie Atkins; Pharmacist John Foster-Coull; Vancouver Island Health Authority, Vancouver
- Drs Olivier Lesur & Francois Lamontagne, Sandra Proulx; Pharmacist Sylvie Cloutier, Brigitte Bolduc, Marie-Pierre Rousseau, Julie Leblond, ; Sherbrooke University Hospital and Centre de Recherche Clinique Étienne-Le Bel, Sherbrooke
- Dr Kosar Khwaja, Laura Banici, Carole Sirois, Lena Havell; Pharmacists Gilbert Matte & Kathleen Normandin; Royal Victoria Hospital, Montreal
- Drs Gerald Hollinger & Vasanti Shende, Vanessa Belcastro; Pharmacist Jane Martin; Guelph General Hospital, Guelph
- Dr Bill Plaxton, Anders Foss; Pharmacy Technicians Heather McDougall, Sharon Morris & Goran Petrovic; Grand River Hospital, Kitchener
- Dr Bojan Paunovic, Kym Wiebe, Nicole Marten; Pharmacist Denise Sawatzky; St Boniface Hospital, Winnipeg
- Dr Jonathan Eisenstat, Tammy Doerle; Pharmacist Linda Skinner; Lakeridge Health, Oshawa
- Drs Steven Reynolds & Sean Keenan, Sheilagh Mans; Pharmacist Ray Jang; Surrey Memorial Hospital, Surrey
- Dr Michael Sharpe, Mona Madady; Pharmacist Chandika Mankanjee; London Health Sciences Center, London

#### **Australian Investigators**

- Drs Jamie Cooper (Lead) & Andrew Davies, Shirley Vallance, Cindy Weatherburn, Jasmin Board, Victoria Bennett; Pharmacists Anne Mak & Sook Wern Chua; Alfred Hospital, Melbourne
- Drs Simon Finfer & Naresh Ramakrishnan<sup>(deceased)</sup>, Simon Bird, Julie Potter, Anne O'Connor, Susan Ankers; Pharmacist Maggie Gibson; Royal North Shore Hospital, Sydney
- Dr Jack Cade, Deborah Barge, Tania Caf, Belinda Howe; Pharmacist Emma Michael; Royal Melbourne Hospital, Melbourne
- Dr Rinaldo Bellomo, Glenn Eastwood, Leah Peck, Donna Goldsmith, Kim O'Sullivan; Lead Pharmacists Dr Michael Ching, Jean Schmidt, Mei Ho & Bailey Lim; Austin Hospital, Melbourne
- Drs David Ernest, Sam Radford, Ann Whitfield & Anthony Cross, Suzanne Elliott, Jaspreet Sidhu, Belinda Howe, Inga Mercer, Angela Hamilton<sup>(deceased)</sup>; Pharmacist Paula Lee; Box Hill Hospital, Melbourne
- Dr John Botha, Jodi Vuat, Sharon Allsop, Nina Fowler; Pharmacist Chui Yap; Frankston Hospital, Frankston
- Drs Tim Crozier, Jonathan Barrett & Chris Wright, Pauline Galt, Carly Culhane, Rebecca Ioannidis, Sue Burton, Marnie Reily, Cyveen Weeraratna; Pharmacist Helen Kopp; Monash Medical Centre, Melbourne
- Dr Ian Seppelt, Leonie Weisbrodt, Robyn Bond; Pharmacists Stella Suen & Jason Trinh; Nepean Hospital, Sydney
- Dr David Evans, Justine Rivett, Stephanie O'Connor, Alex Poole; Pharmacist Peter Slobodian; Royal Adelaide Hospital, Adelaide
- Dr Clive Woolfe, Dorrilyn Rajbhandari, Caitlin Rees; Pharmacist Justine Hay; Royal Prince Alfred Hospital, Camperdown

- Drs John Edington & Jason Fletcher, Julie Smith, Catherine Boschert; Pharmacist Richard Summers; Bendigo Health Care, Bendigo
- Dr Graham Reece, Treena Sara, Kiran Nand; Pharmacist Rabsima Ibrahim; Blacktown Hospital, Blacktown
- Drs Andrew Bersten & Alex Gallus, Elisha Matheson, Margie O'Callaghan; Pharmacist Kelly Woolley; Flinders Medical Center, Adelaide
- Dr Neil Orford, Tania Elderkin, Melissa Fraser, Allison Bone, Tania Salerno, Anne Kinmonth; Pharmacist Paul Muir; Barwon Health, Geelong Hospital, Geelong
- Dr Subhash Arora, Bridget O'Bree, Katherine Shepherd; Pharmacists Kerry Gray & Tu Vinh; Dandenong Hospital, Dandenong
- Drs Alan Davey–Quinn & Martin Sterba, Bronwyn Ruth Johnson, Renee Xu, Francisco Hill; Pharmacist Julie Thompson; Wollongong Hospital, Wollongong
- Dr Rajaram Ramadoss, Josette Wood; Pharmacist Eric Tah Wai Yap; Lyell McEwin Hospital, Adelaide

#### **Brazilian Investigators**

- Dr Marcelo Garcia da Rocha (Co-Lead), Andréa Kramer, Martha Hädrich; Pharmacist Patrícia Soares, Fernando Frosi; Santa Casa Hospital, Porto Alegre
- Drs Nilton Brandao, Cassiano Teixeira & Cíntia Roehrig, Juliana Zeni; Pharmacist Daniel Panizzi; Moinhos de Vento Hospital, Porto Alegre
- Drs Suzana Alves da Silva & Rubens Costa Filho, Renato Correa Alves Moreira and Plínio N. Gomes & Rodrigo Biondi; Pharmacist Marcia Caneca, Grazielle Silva, Pró Cardíaco Hospital, PROCEP, Rio de Janeiro
- Drs Otavio Berwanger (Co-Lead) & Edson Romano, Anna Maria Buehler; Pharmacist Marcelo Murad & Paulo Buononato; Hospital Coracao Research Institute HCor, São Paulo
- Drs Helio Penna Guimarães & Renato D Lopes, Adriano Truffa, Rosana Nakamura, Lillian Mazza Barbosa; Pharmacist Rosana Suemi Nakamura; Hospital São Paulo, São Paulo

#### **Saudi Arabian Investigators**

- Dr Ismael Qushmaq (Lead), Jean Brennick, Sawsan Bassi; Pharmacist Amnah Mukhtar, Majdah Attas & Amer Soliman; King Faisal Specialist Hospital and Research Center, Jeddah
- Dr Mohammed Alsultan & Yaseen Arabi, Riette Brits; Pharmacist Antoine Cherfan; King Saud Bin Abdulaziz University for Health Sciences, Riyadh
- Dr Jamal Alhashemi, Sanaa Shalabi; Pharmacist Randa Ainosah; King Abdulaziz University Hospital, Jeddah
- Drs Yasser Mandourah & Nadeem Shaikh; Pharmacist Shatha Shosho; Riyadh Military Hospital, Riyadh
- Drs Manal Al-Hazmi & M. Ali Al-Azem, Trevor Wyngaard; Pharmacist Yahya Moustafa; King Fahad Medical City Hospital, Riyadh

#### **United States Investigators**

- Dr James Klinger, Barbara Smithson; Pharmacist Andrea Monckeberg; Rhode Island Hospital, Providence
- Dr Nicholas E Vlahakis (Lead), Laurie Meade; Pharmacist Debbie Bauer; Mayo Clinic, Rochester
- Dr Michael Cox, Jackie O'Brien, Catherine Krause; Pharmacist Sandra Ahearn; St John's Mercy Medical Center, St Louis
- Drs Joseph Nates & Sajid Haque, Deidre Mooring, Rose Erfe, Paula Nickerson; Pharmacist Kim McConnell; University of Texas MD Anderson Cancer Center, Houston

#### **United Kingdom Investigators**

- Drs Marlies Ostermann (Lead) & David Treacher, Tony Sherry, John Smith, Barnaby Sanderson, Josephine Ng, John Brooks, Ling Lim, Katie Lei; Pharmacists Paul Tunstell & Dr Cathy McKenzie, Francesco Cicirello; King's College London, Guy's & St Thomas' Hospital, London

## **Radiology and Vascular Ultrasound Collaborators:**

### **Canada**

- Lead Radiologist Dr David Schiff, Lead Technologists Jennifer McDonald, Sarah Todd, Patty Harkness, Angela Medic, Joanna Andrews, Moira Sands, Iwona Hall, Tanya Boniakowski, Kim Lichty; St Joseph's Healthcare, Hamilton
- Lead Technologists Jan Gilby, Ronda Allen, Corina Doary, Jill Slade Sarah Black; Capital Health QEII Health Science Center, Halifax
- Lead Radiologist Dr Michael Patlas, Lead Technologists Lianne Broughton, Lucy Degrow, Dianna Connor, Maggie Tuhy, Dawn Whyte, Meaghan Jefferson, Kaitlyn Aarts, Lindsay Vooyoys, Michael Anzovino; Hamilton Health Sciences, Hamilton General Hospital, Hamilton
- Lead Radiologist Dr Sat Somers, Lead Technologists Susan Kinnear & Judy Bell; Hamilton Health Sciences, McMaster Hospital, Hamilton
- Lead Technologist Debbie Havill; University Health Network, Toronto General Hospital, Toronto
- Lead Radiologist Dr Jean-Luc Gariépy & the Radiology Department; Hôpital de l'Enfant-Jésus, Quebec City
- Lead Radiologist Dr Martin Francoeur; Charles LeMoine Hospital, Montreal
- Lead Radiologist Dr Wael Shabana, Lead Technologists Barbara Dwyer, Heather Munro-Gear, Debbie Cattan, Marina Koudrina, Jennifer Beach, Shamraiz Khan, Manon Pilotte, Helen Weick, Megan White, Huyen Vuong, Jane St-Germain; Ottawa Civic Hospital, Ottawa
- Lead Radiologist Dr Wael Shabana, Lead Technologists Marc Castonguay, Sohail Anwar, Valentina Kozarenko, Shahina Mohammad, Svitlana Sikalska, Suzanne Gauthier, Arif Mustafa; Ottawa General Hospital, Ottawa
- Radiology Department; Maisonneuve Rosemont Hospital, Montreal
- Lead Radiologist Dr Maria Danais; Hôpital du Sacré-Coeur de Montréal
- Lead Technologist Debbie Havill; Mount Sinai Hospital, Toronto
- Lead Radiologists Drs Alan Moody & Paul Hamilton; Lead Technologist Sonia Welsh, Nelson Chew, Kathy Davis, Carolyn Maloney, Millie Brown, Susan Fitzwilliam, Mary Kandithil, Assma Hasmi, Terri Norman, John Wong; Sunnybrook Hospital, Toronto
- Lead Radiologist Dr Derek Muradali, Lead Technologist George Georgy; St Michael's Hospital, Toronto
- Lead Radiologist Dr Saurbrei, Lead Technologists Jennifer Cox, Angela Nugent, Julie Kolesar, Amy Fisher, Amy Northrup-St-Onge, Marshaw Paterson-Skeete, Wendy Schlotke, Wendy Bertrim, Cathy Marshall; Kingston General Hospital, Kingston
- Lead Radiologist Dr Ken Wong, Lead Technologists Nell Venir, Jackie Langtry, Mandy Rai, Natalie Coutu, Janet Graham, Cyd Grant, Cindy Smith; Royal Columbian Hospital, New Westminster
- Lead Radiologist Dr Anne R Buckley; Vancouver General Hospital, Vancouver
- Lead Radiologist Drs Leipsic, Meiersdorf, Yoong, Flores, Mumtaz & Ng, Lead Technologist Cathy Fix; St. Paul's Hospital, Vancouver
- Radiology Department; Foothills Hospital, Calgary University, Calgary
- Lead Technologist Debbie Havill; University Health Network, Toronto Western Hospital, Toronto
- Lead Radiologist Dr Gord Askew & the Radiology Department; Royal Alexandra Hospital, Edmonton
- Lead Radiologist Dr Sylvie Bilodeau, Lead Technologists Marilyse Cloutier, Michel Bélanger, France Bélanger; Laval Hospital, Quebec City
- Lead Radiologist Drs Minuk, Dhamanaskar & Griffiths, Lead Technologists Laura Whyntott, Katie Janicki, Sharon Paterson; Hamilton Health Sciences, Juravinski Hospital, Hamilton
- Lead Radiologists Dr E Wiebe & Dr T Ackerman, Lead Technologist Marina Blaskovits; University of Alberta, Edmonton
- Radiology Department; Peter Lougheed Hospital, Calgary University, Calgary
- Lead Radiologist Dr George Kintzen, Lead Technologists Nicole Belland, Louise Gaudreau, Lucie Roy, Patricia Allan, Diane Russell, Daniella Salvatori, Renee Drolet, Anna Pulice; Montreal General Hospital, Montreal

- Lead Radiologist Dr Richard Eddy, Lead Technologist Sandra Seher; Vancouver Island Health Authority, Vancouver
- Lead Radiologist Dr Gérard Schmutz; Sherbrooke University Hospital, Sherbrooke
- Lead Radiologist Dr Marc Corriveau, Lead Technologists Cristina Pornaro, France Singher, Diana Skelly, Sonia Gay, Anca Patruncul Nastase, Ginette Madore; Royal Victoria Hospital, Montreal
- Lead Radiologist Dr Mohan Patel, Lead Technologist Mark Lovallo; Guelph General Hospital, Guelph
- Lead Radiologist Dr Danilo Wycoco, Lead Technologists Maureen Hengeveld, Gail Ennis, Janice Bayley, Linda Kennedy, Nancy Wilson, Mary Matthews, Mary Beth Boyer, Beth Burkhart, Gillian Brooke, Tracey Kok, Heather Fotiadis, Claire Bevan; Grand River Hospital, Kitchener
- Lead Radiologist Dr Fern Karlicki, Lead Technologist Keith McDonald; St Boniface Hospital, Winnipeg
- Radiology Department; Lakeridge Health, Oshawa
- Lead Radiologist Dr Dennis Janzen, Lead Technologist Heather Ryan; Surrey Memorial Hospital, Surrey
- Lead Radiologist Dr Ian Ross, Lead Technologist Marilyn Higgins; London Health Sciences Center, London

### **Australia**

- Lead Radiologist Dr Samantha Ellis, Lead Technologist Judy Wills; Alfred Hospital, Melbourne
- Lead Radiology and Vascular Ultrasound Collaborators Drs Charles Fisher & Linda Thebridge; Royal North Shore Hospital, Sydney
- Lead Technologists Paula King & Tanya McDonald; Royal Melbourne Hospital, Melbourne
- Lead Radiologist Dr Frank Malara, Lead Technologists Lynne Johnson, Anne Potter, Linda McLeod, John Skinner, Patrick Nowlan, Sarah Burgess, Niki Koutrouza, K-T Fraser, Robyn Archard, Tim Huynh, Brett Ayres; Austin Hospital, Melbourne
- Lead Radiologist Dr Raj Nagarajan, Lead Technologist Frank Curcio; Box Hill Hospital, Melbourne
- Lead Radiologist Dr Steve Ward, Lead Technologist Bert Thorbeck; Frankston Hospital, Frankston
- Lead Technologist Peter Coombes; Monash Medical Centre, Melbourne
- Lead Vascular Surgeon Dr Roger Hall, Lead Vascular Sonographers Richard Huang & Helen Chow; Nepean Hospital, Sydney
- Department of Ultrasound; Royal Adelaide Hospital, Adelaide
- Lead Radiologist Prof John Harris, Lead Technologists Alison Burnett, Catherine Kovatch, Virginia Makeham; Royal Prince Alfred Hospital, Camperdown
- Lead Radiologist Dr Sarah Skinner, Lead Technologist Luke Adnori; Bendigo Health Care, Bendigo
- Lead Radiologist Dr James Jarrett, Lead Technologists Jagdish Seehra, Gill Stringer; Blacktown Hospital, Blacktown
- Radiology Department; Flinders Medical Center, Adelaide
- Lead Technologist Russell Boustead; Geelong Hospital, Geelong
- Lead Radiologist Dr Ronnie Ptasznik, Lead Technologist Gavin Clifton; Dandenong Hospital, Dandenong
- Lead Radiologists Drs Nigel Wylie, Alok Gupta & Dharmesh Modi, Lead Technologists Pjal Kitulagodage, Simon Oti, Colin Green, Rachel Cassat-Ryan, Liam Daly, Simonne Doornbos, Anita Dalkeith; Wollongong Hospital, Wollongong
- Lead Radiologist Dr Ian Thomas, Lead Technologists Stewart McGavin, Christina Preen; Lyell McEwin Hospital, Adelaide

### **Brazil**

- Lead Radiologist Dr Fernando Leiria & Dr. Milton Lopes; Santa Casa Hospital, Porto Alegre
- Lead Radiologist Dr Fabricio Bergelt de Sousa; Moinhos de Ventos Hospital, Porto Alegre
- Lead Radiologist Drs Isaac Hees Aveiro & Arnaldo Rabischoffsky; Pró Cardíaco Hospital, Rio de Janeiro
- Lead Radiologist Dr Carlos Gabriel Nardy Pereira; Hospital Coracao, Sao Paulo
- Lead Radiologist Dr Carlos Gabriel Nardy Pereira; Hospital São Paulo, São Paulo

### **Saudi Arabia**

- Lead Radiologist Drs Irfan Mamoun & Majid Ashour, Lead Technologists Noor Ali, Lenith Salazar, Armi Yasay, Jessel Teves, Johanna Vega; King Faisal Specialist Hospital and Research Center, Jeddah
- Lead Radiologist Dr Ghassan Maziad; King Saud Bin Abdulaziz University for Health Sciences, Riyadh
- Lead Technologists Julie Ann Sonbul, Rustico Gloriani, Rosalinda Huertazuela, Ibrahim Abbas, Judy Chavez, Nahid El Toum; King Abdulaziz University Hospital, Jeddah
- Lead Ultrasonographer Dr Nadeem Shaikh; Riyadh Military Hospital, Riyadh
- Lead Radiologist Dr Mohammed AlZoum, Lead Technologists Ibrahim A AlHomali, Mohammed AlSaadi; King Fahad Medical City Hospital, Riyadh

### **United States**

- Radiology Department; Rhode Island Hospital, Providence
- Lead Radiologist Dr Bradley Lewis, Lead Technologist Nora Harer; Mayo Clinic, Rochester
- Lead Technologist Lynn Thorpe; St John's Mercy Medical Center, St Louis
- Lead Radiologist Dr Deepak Bedi; University of Texas MD Anderson Cancer Center, Houston

### **United Kingdom**

- Lead Radiologist Dr TS Padayachee, Lead Technologists N Thomas, AJ Arnold; King's College London, Guy's & St Thomas' Hospital, London

**Radiology Consultants:** Dr David Schiff, St Josephs Healthcare, Hamilton, Dr Allan Moody, Sunnybrook Hospital, Toronto (Canada)

**Ultrasound Technology Consultants:** Jennifer McDonald (Canada), St Josephs Healthcare Hamilton, Hamilton, Judy Wills (Australia), The Alfred, Melbourne

**Thrombosis Consultants:** Drs Shannon Bates, Sam Shulman, David Anderson, Susan Kahn

**Pharmacy Consultant:** Gita Sobhi, Hamilton Health Science Center, Hamilton

**Leg Deep Vein Thrombosis Adjudication Committee:** Drs Wendy Lim, Ryan Zarychanski, Marcelo Rocha, Deborah Cook

**Other Deep Vein Thrombosis Adjudication Committee:** Drs Peter Dodek, Lauralyn McIntyre, Francois Lamontagne, Deborah Cook

**Pulmonary Embolism Adjudication Committee:** Drs Maureen Meade, Sangeeta Mehta, Rick Hall, Deborah Cook

**Bleed Adjudication Committee:** Drs Donald Arnold, Francois Lauzier, Christian Rabbat, Deborah Cook

**HIT Adjudication Committee:** Drs Mark Crowther, Theodore E Warkentin, Deborah Cook

**HIT Reference Laboratory:** Dr Theodore E Warkentin, Jo-Ann Sheppard

**PROTECT Methods Center:** Nicole Zytaruk, Lois Saunders, Suzanne Duchesne, Jennifer Southon, France Clarke, Bronwyn Barlow-Cash, Katherine Krolicki, Kristina Lutz, Shelley Kraus, Ashley Bernotas, Christa Yeo, Peggy Austin, Neala Hoad, Tammy French, Linda Oronato, Diane Heels-Ansdell, Lisa Buckingham, Aravin Duraikannan, Norma Brown, Chris Cotoi, Luqi Wang, Sandeep Bhandari, Laurel Grainger, Deborah Maddock, Pat Smith, Shawn Billington, Maureen Meade, Gordon Guyatt, Stephen Walter and Deborah Cook, McMaster University & St Joseph's Healthcare, Hamilton, Canada

**PROTECT Steering Committee:** Deborah Cook (Principal Investigator), Mark Crowther, Maureen Meade, Gordon Guyatt, William Geerts, D Jamie Cooper, Ismael Qushmaq, Marcelo Rocha, Otavio Berwanger, Theodore E Warkentin, Nicole Zytaruk (Project Manager, Global), Shirley Vallance (Project Manager, Australia), Diane Heels-Ansdell & Stephen Walter (Biostatisticians)

**Data Monitoring Committee:** Drs Robin Roberts (Chair), Christian Brun-Buisson and Victor Montori

**PROTECT Writing Committee:** Deborah Cook (Chair), Maureen Meade, Gordon Guyatt, Stephen Walter, Diane Heels-Ansdell, William Geerts, Theodore E Warkentin, D Jamie Cooper, Ismael Qushmaq, Marcelo Rocha, Otavio Berwanger, Nicholas E Vlahakis, Nicole Zytaruk, Shirley Vallance, Mark Crowther

## **Trial Management and Oversight**

To ensure protocol adherence and data quality, initial training sessions were held for research personnel. Methods Center resources included manuals, standard operating procedures, slide sets and a website. Research coordinators submitted data using an internet-based or direct fax-to-computer system (Datafax, Hamilton, Canada). Methods Center personnel validated data and the trial biostatistician assessed data integrity throughout recruitment by central statistical monitoring [1,2]. Site-specific and general audit and feedback were provided using quality control documents, site visits, conference calls, electronic communication, newsletters, and study meetings and research consortium updates.

Research Ethics Boards approved the protocol at participating centers. A modified DAMOCLES Charter [3] guided the independent Data Monitoring Committee of a biostatistician and 2 clinician scientists. The trial biostatistician provided blinded reports to the committee regarding protocol adherence, trial management indicators, effectiveness and safety reports, and the 2 interim and final analyses.

## **References**

- 1) Baigent C, Harrel FH, Buyse M, Emberson JR, Altman DG. Ensuring trial validity by data quality assurance and diversification of monitoring methods. Sensible Guidelines Conference. *Clinical Trials* 2008;5:49-55.
- 2) Heels-Ansdell D, Walter S, Guyatt G, Warkentin T, Crowther Mark, Geerts W, Berwanger O, Rocha M, Freitag A, Cooper J, Qushmaq I, Zytaruk N, Cook DJ for the PROTECT Investigators, Canadian Critical Care Trials Group and the Australian and New Zealand Intensive Care Society Clinical Trials Group. Central statistical monitoring in an international thromboprophylaxis trial. *Am J Respir Crit Care Med* 2010;181:A6041.
- 3) DAMOCLES Study Group. A proposed charter for clinical trial data monitoring committees: helping them to do their job well. *Lancet* 2005;365:712-722.

## Diagnosis of Pulmonary Embolism

We classified pulmonary embolism (PE) as definite PE, probable PE, possible PE, or no PE. Definite PE was defined by a clearly positive test (such as characteristic intraluminal filling defect on chest computed tomography or high probability ventilation-perfusion scan). Probable PE was defined by a high clinical suspicion (moderate or high pretest probability) and either a non-diagnostic test for PE or no test for PE. Possible PE was defined as low clinical suspicion (low pre-test probability) and a non-diagnostic test for PE. 'No test for PE' is not part of the definition of a possible PE because the clinical concern had to be sufficient to order a test unless the patient was moribund or pre-terminal. No PE was defined as either no test for PE or a clearly negative test for PE. Examples follow:

### Definite PE

A 46 year old male was admitted to ICU with severe acute alcoholic pancreatitis and hypovolemic shock. For 5 days, he required mechanical ventilation with  $FiO_2$  of 0.35, and inotrope infusion. On day 6, he became more hypoxic requiring  $FiO_2$  of 0.60. The chest x-ray showed bilateral effusions, unchanged from admission. Chest computed tomography showed an intraluminal filling defect in segmental branches of the left lower lobe and right upper lobe. Study drug was discontinued and intravenous heparin was started.

### Probable PE

A 71 year old female was admitted to ICU with septic shock and acute respiratory distress syndrome due to pseudomonas pneumonia. For 8 days, she was treated with lung protective mechanical ventilation, inotropes, and intermittent hemodialysis. On day 9, she developed a swollen left upper arm. Ultrasound revealed a non-compressible left internal jugular vein thrombus at the site of a central venous dialysis catheter inserted 4 days previously. The catheter was removed and study drug continued. On day 10, twice weekly screening ultrasound showed a non-compressible right femoral vein thrombus. No catheter had been inserted at that site previously. Study drug was discontinued and intravenous heparin was started. However, within 4 hours, refractory hypotension and hypoxia developed. Chest x-ray showed no

pneumothorax or other interval change. Transesophageal echocardiography showed a markedly dilated right ventricle and a suspicion of a mobile echodense structure in the right pulmonary artery. The patient died before any other tests could be performed.

#### Possible PE

A 52 year old female with severe chronic obstructive airways disease and recently resected bowel cancer was admitted to ICU post-operatively with a severe wound infection, dehiscence and septic shock. For 5 days following re-operation, she required mechanical ventilation with  $FiO_2$  of 0.4 and inotrope infusion. On day 6 in the ICU, she developed hypoxia requiring  $FiO_2$  0.7, and required a second inotrope.

Electrocardiogram showed sinus tachycardia, a new right bundle branch block and new right axis deviation. The chest x-ray was unremarkable. Urgent bedside transthoracic echocardiography was technically difficult but showed a markedly dilated right ventricle. She suffered a cardiopulmonary arrest and died within 3 hours.

## Bleeding Definitions

Bleeding was classified as “major” if it was

- a) Life threatening bleeding due to hypovolemic shock (e.g., from ruptured abdominal aortic aneurysm or upper or lower gastrointestinal hemorrhage)
- b) Life threatening bleeding at a critical site (e.g., intracranial, retroperitoneal, pericardial)
- c) Overt, clinically important bleeding associated with one of the following within 24 hours of the bleed: decrease in hemoglobin  $>20$  g/L, transfusion  $\geq 2$  packed red blood cells, or decrease in systolic blood pressure  $> 20$ mmHg or increase in heart rate  $> 20$ bpm *in the absence of other causes*
- d) Bleeding at other critical sites (e.g., epidural, intraocular or intraarticular)
- e) Bleeding requiring an invasive intervention (e.g., re-operation)

Bleeding was considered “minor” if it was

- a) overt, but did not meet criteria for major bleeding (e.g., epistaxis, wound-related bleeding, etc)
- b) minor bleeding could be temporally associated with  $\geq 2$  units packed red blood cells

## **Serious Adverse Events**

Serious adverse events were reported for 7 (0.4%) patients in the dalteparin group and 6 (0.3%) patients in the unfractionated heparin group, respectively,  $p=0.76$ . Patients in the dalteparin group had a major bleed (6 patients) and HIT with an arterial thrombus (1 patient). Patients in the unfractionated heparin group had major bleeds (5 patients) and HIT with a venous and intracardiac thrombus (1 patient).

Our approach to serious adverse event reporting in this academic trial testing two widely available drugs follows recommendations from the Sensible Conduct of Clinical Trials Symposium held in Washington, DC in 2007 [1]. These methods were approved by the Canadian Critical Care Trials Group, the Australian and New Zealand Intensive Care Society, the PROTECT Data Monitoring Committee and Health Canada.

## **Reference**

1. Cook DJ, Lauzier F, Rocha MG, Sayles MJ, Finfer S. Serious adverse events in academic trials of common drugs in critical care. *Can Med Assoc J* 2008; 178(9):1181-1184.

## **Meaningful Reporting of Serious Adverse Events in Academic Trials of Established Drugs in ICU**

1. We recommend that before commencing academic critical care trials of common drugs, investigators should clearly describe the serious adverse events (SAEs) they plan to identify and report in their protocol, for review by local Research Ethics Boards and Data Monitoring Committees. Investigators should consider labeling the most concerning SAEs as primary, secondary or tertiary outcomes. Adverse events already defined and reported as study outcomes should not routinely also be labeled and reported as SAEs.
2. We recommend that in academic critical care trials of common drugs, SAEs should be largely limited to serious events that are known to result from the study drug, or which might reasonably occur as a consequence of the study drug.
3. We recommend that in academic critical care trials of common drugs, caution is warranted to avoid definitively attributing adverse events to the study drugs; this attribution is more sensible when SAEs are reported in the 2 arms of the trial, examined at an interim analysis or when the trial is complete.
4. We recommend that in academic critical care trials of common drugs, caution is warranted to avoid attributing deaths as SAEs related to the study drug.
5. We recommend that a key role for Research Ethics Boards receiving real-time single-center SAE reports is to identify problems requiring remediation of the protocol or its implementation. Independent Data Monitoring Committees should monitor and interpret individual SAEs in the context of emerging literature, the number of events and patients in each arm enrolled locally and across all centers, and in the context of other trial outcomes. Periodic Data Monitoring Committee reports should be sent to each local Research Ethics Board according to the trial protocol.

**Appendix Table 1. Venous Thromboembolic Outcomes (Per-Protocol Analysis)**

|                                            | <b>Dalteparin<br/>(N=1566)</b> | <b>Unfractionated<br/>Heparin<br/>(N=1561)</b> | <b>Hazard Ratio (95% CI)</b> | <b>P-value</b> |
|--------------------------------------------|--------------------------------|------------------------------------------------|------------------------------|----------------|
| Proximal leg DVT                           | 91 (5.8)                       | 99 (6.3)                                       | 0.95 (0.70, 1.29)            | 0.75           |
| Any DVT                                    | 131 (8.4)                      | 150 (9.6)                                      | 0.95 (0.73, 1.22)            | 0.67           |
| Pulmonary embolism                         |                                |                                                |                              |                |
| Definite                                   | 17 (1.1)                       | 27 (1.7)                                       |                              |                |
| Probable                                   | 4 (0.3)                        | 7 (0.4)                                        |                              |                |
| Possible                                   | 1 (0.06)                       | 3 (0.2)                                        |                              |                |
| Definite or Probable                       | 21 (1.3)                       | 34 (2.2)                                       | 0.54 (0.30, 0.98)            | 0.04           |
| Any pulmonary embolism                     | 22 (1.4)                       | 37 (2.4)                                       | 0.54 (0.30, 0.95)            | 0.03           |
| Any VTE                                    | 146 (9.3)                      | 170 (10.9)                                     | 0.91 (0.72, 1.16)            | 0.44           |
| VTE or hospital death                      | 439 (28.0)                     | 474 (30.4)                                     | 0.95 (0.83, 1.09)            | 0.44           |
| Heparin-induced<br>thrombocytopenia, N (%) | 3 (0.2)                        | 12 (0.8)                                       | 0.27 (0.08, 0.98)            | 0.046          |

(CI= confidence interval, DVT=deep-vein thrombosis, VTE=venous thromboembolism)

**Appendix Table 2. Subgroup Analyses: Proximal Leg DVT (Intention-to-Treat Analysis)**

| Subgroup                                              | Dalteparin            | Unfractionated Heparin | Hazard Ratio (95% CI) <sup>1</sup> | P Value for Interaction |
|-------------------------------------------------------|-----------------------|------------------------|------------------------------------|-------------------------|
|                                                       | Events / patients (%) | Events / patients (%)  |                                    |                         |
| <b>Admission Type</b>                                 |                       |                        |                                    |                         |
| Medical                                               | 78/1409 (5.5)         | 81/1422 (5.7)          | 1.04 (0.75, 1.44)                  | 0.11                    |
| Surgical                                              | 18/464 (3.9)          | 28/451 (6.2)           | 0.57 (0.29, 1.10)                  |                         |
| <b>Vasopressors</b>                                   |                       |                        |                                    |                         |
| No                                                    | 50/1057 (4.7)         | 48/990 (4.8)           | 0.96 (0.62, 1.49)                  | 0.99                    |
| Yes                                                   | 46/805 (5.7)          | 61/872 (7.0)           | 0.97 (0.63, 1.49)                  |                         |
| <b>End Stage Dialysis<br/>Dependent Renal Disease</b> |                       |                        |                                    |                         |
| No                                                    | 91/1805 (5.0)         | 106/1804 (5.9)         | 0.92 (0.68, 1.24)                  | 0.65                    |
| Yes                                                   | 5/60 (8.3)            | 3/58 (5.2)             | 1.40 (0.23, 8.56)                  |                         |

<sup>1</sup> Hazard ratios were obtained from Cox Regression stratified by center and medical versus surgical admission status.

**Appendix Figure 1.\***

This figure shows the flow of patients in the trial. See the footnote below for details.

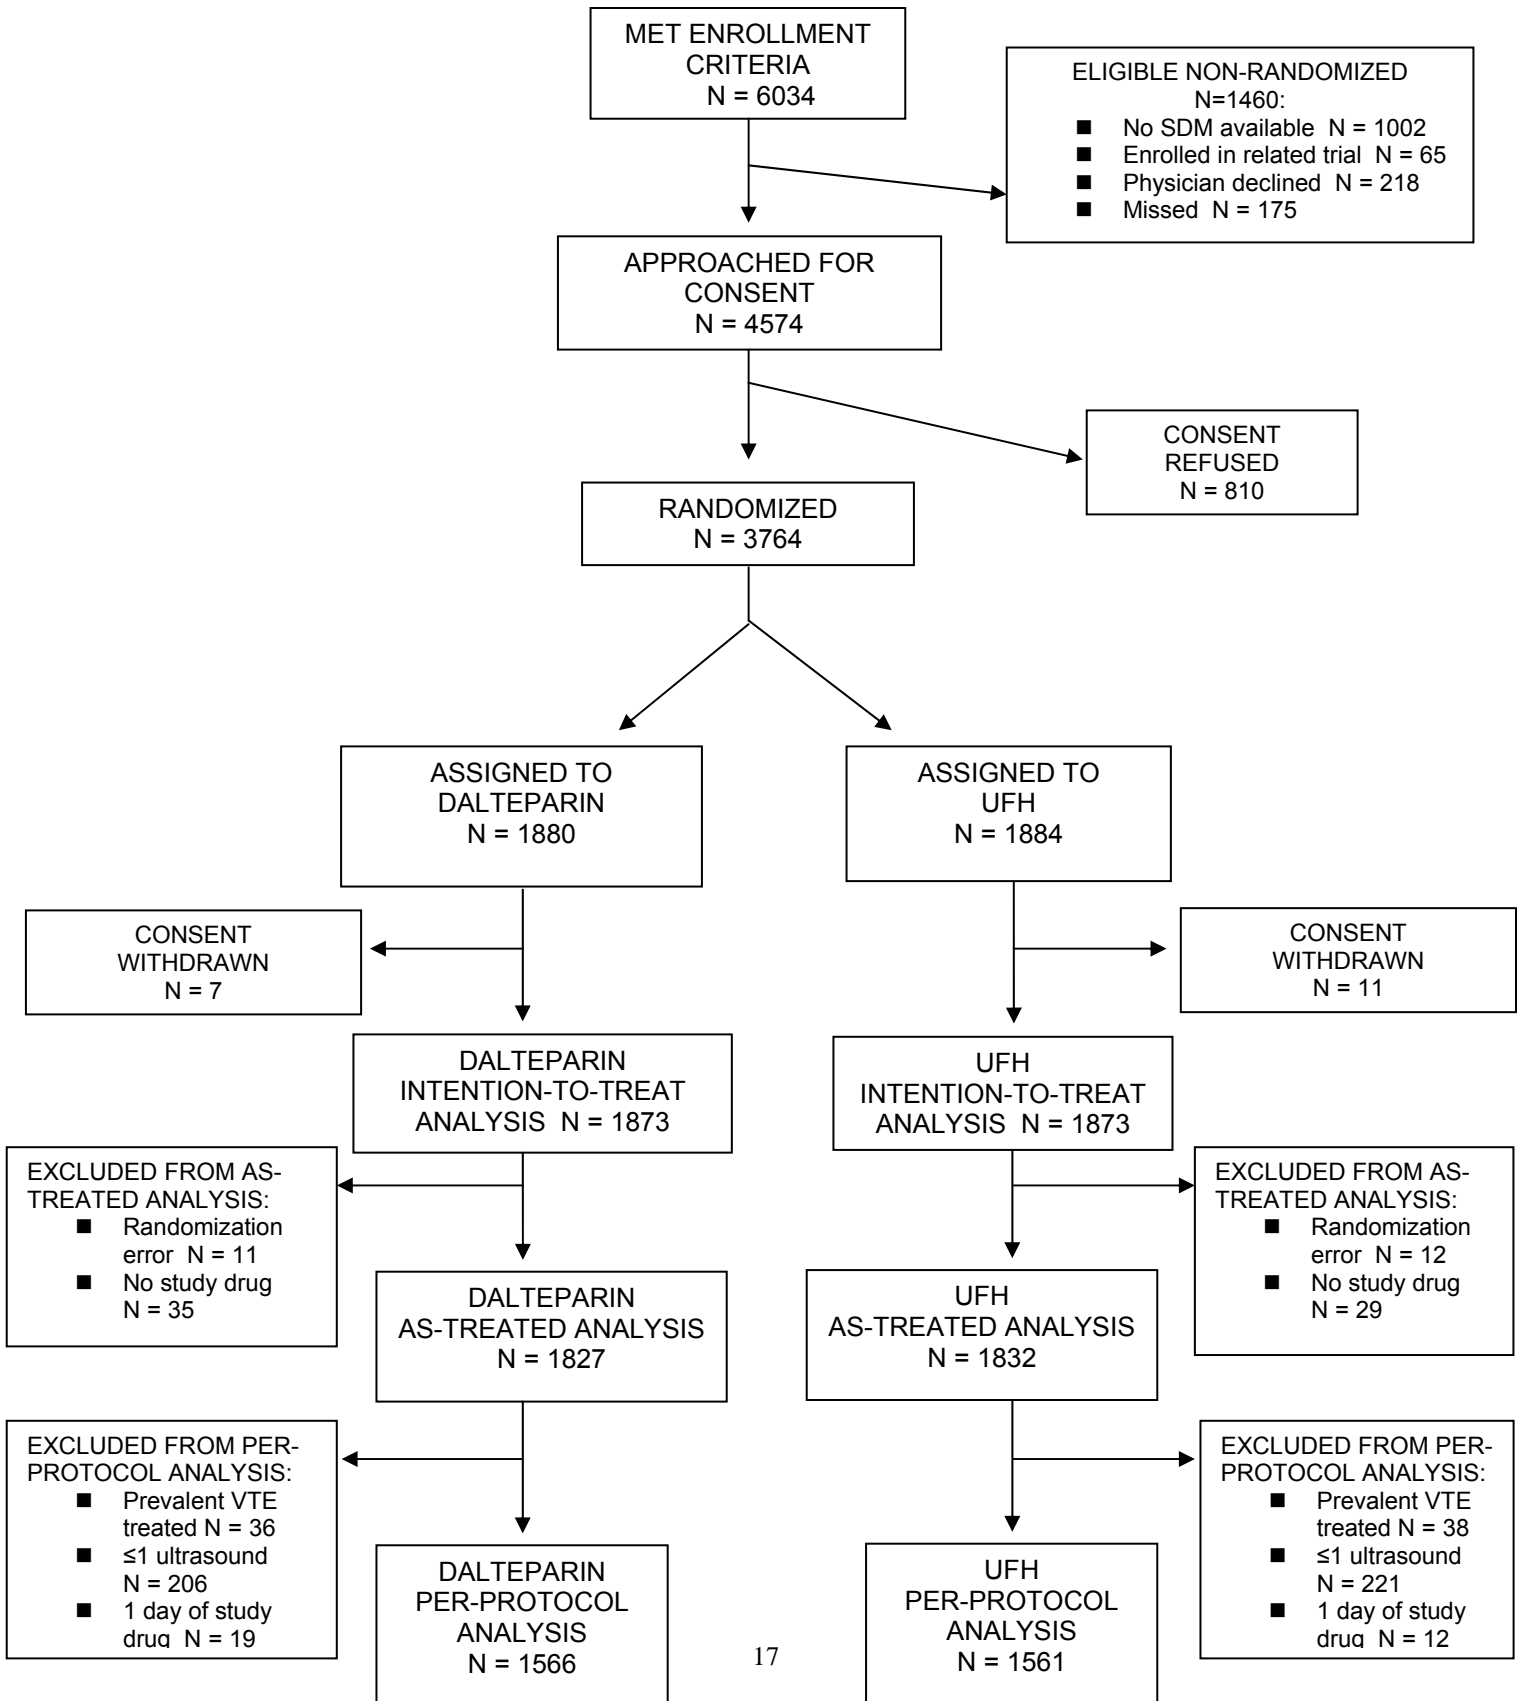

\* Eligible patients fulfilled all inclusion criteria and had no exclusion criteria. Eligible non-randomized patients are categorized as follows: 1002 patients had no substitute decision maker available (e.g., had no family members or no family members reachable, etc.); 65 patients were enrolled in a related trial (e.g., a trial testing a drug or device that influenced thrombotic or bleeding risk, industry trial precluding co-enrolment, etc.); 218 patients had a physician who declined to permit their patients to be approached (e.g., concern about patient's clinical status, family's psychosocial situation, etc.); 175 patients were missed (e.g., research coordinator, study pharmacist, or ultrasonographer unavailable, administrative error, workload due to H1N1 epidemic, etc.). UFH = unfractionated heparin, SDM = substitute decision maker.

**Appendix Figure 2.**

This figure shows the Kaplan-Meier time-to-event curves for pulmonary embolism.

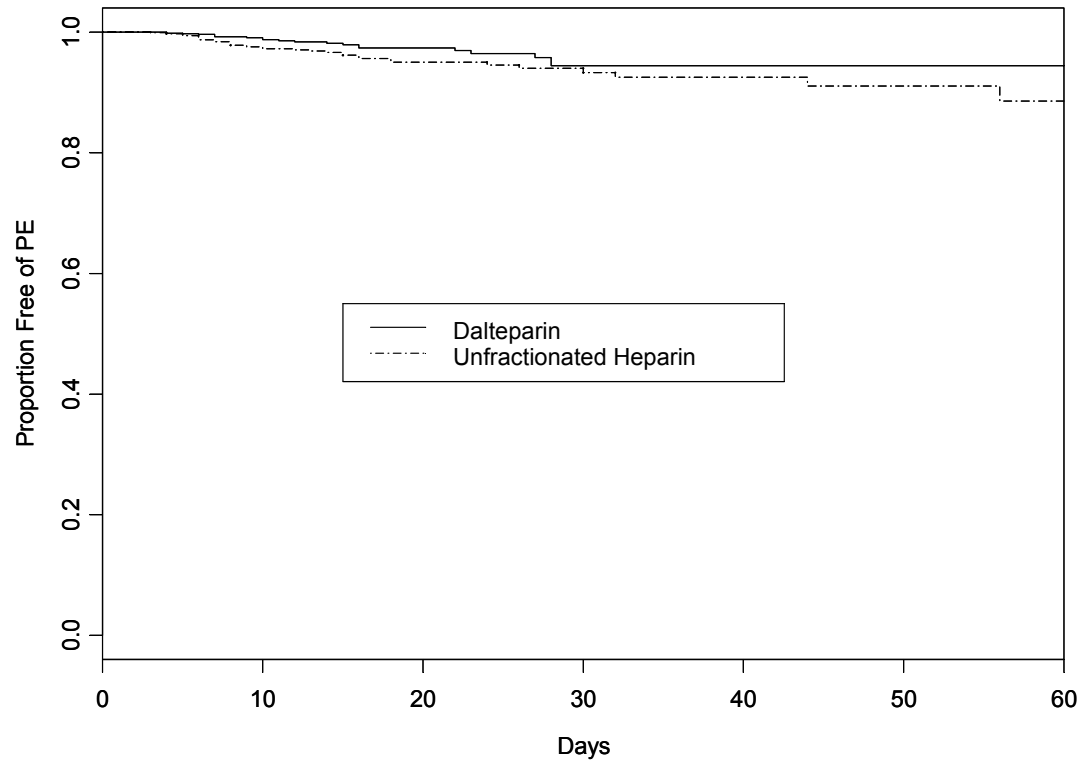

**No. at risk**

|                        |      |     |     |     |    |    |    |
|------------------------|------|-----|-----|-----|----|----|----|
| Dalteparin             | 1873 | 638 | 261 | 135 | 74 | 44 | 30 |
| Unfractionated Heparin | 1873 | 620 | 252 | 108 | 66 | 40 | 21 |

**Appendix Figure 3.**

This figure shows the Kaplan-Meier time-to-event curves for any venous thromboembolism.

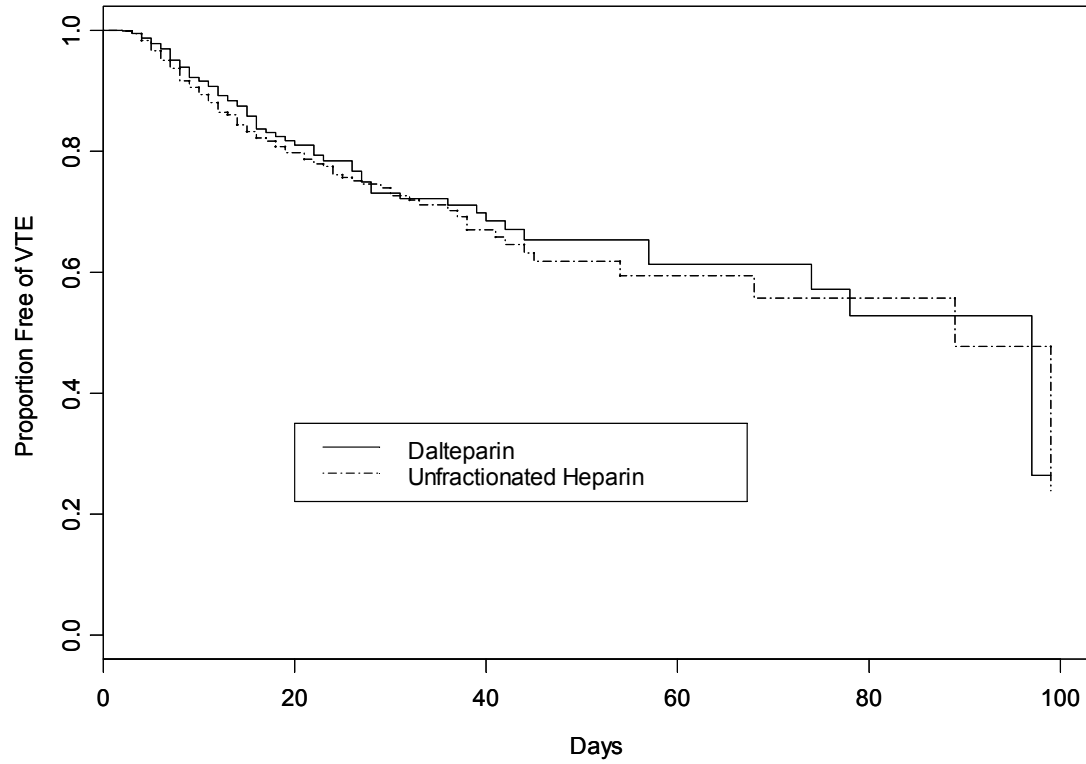

**No. at risk**

|                        |      |     |    |    |    |   |
|------------------------|------|-----|----|----|----|---|
| Dalteparin             | 1873 | 230 | 59 | 21 | 10 | 2 |
| Unfractionated Heparin | 1873 | 219 | 53 | 15 | 12 | 1 |

Appendix Figure 4.

This figure shows the numbers of proximal leg deep venous thromboses detected in the trial, by day from randomization.

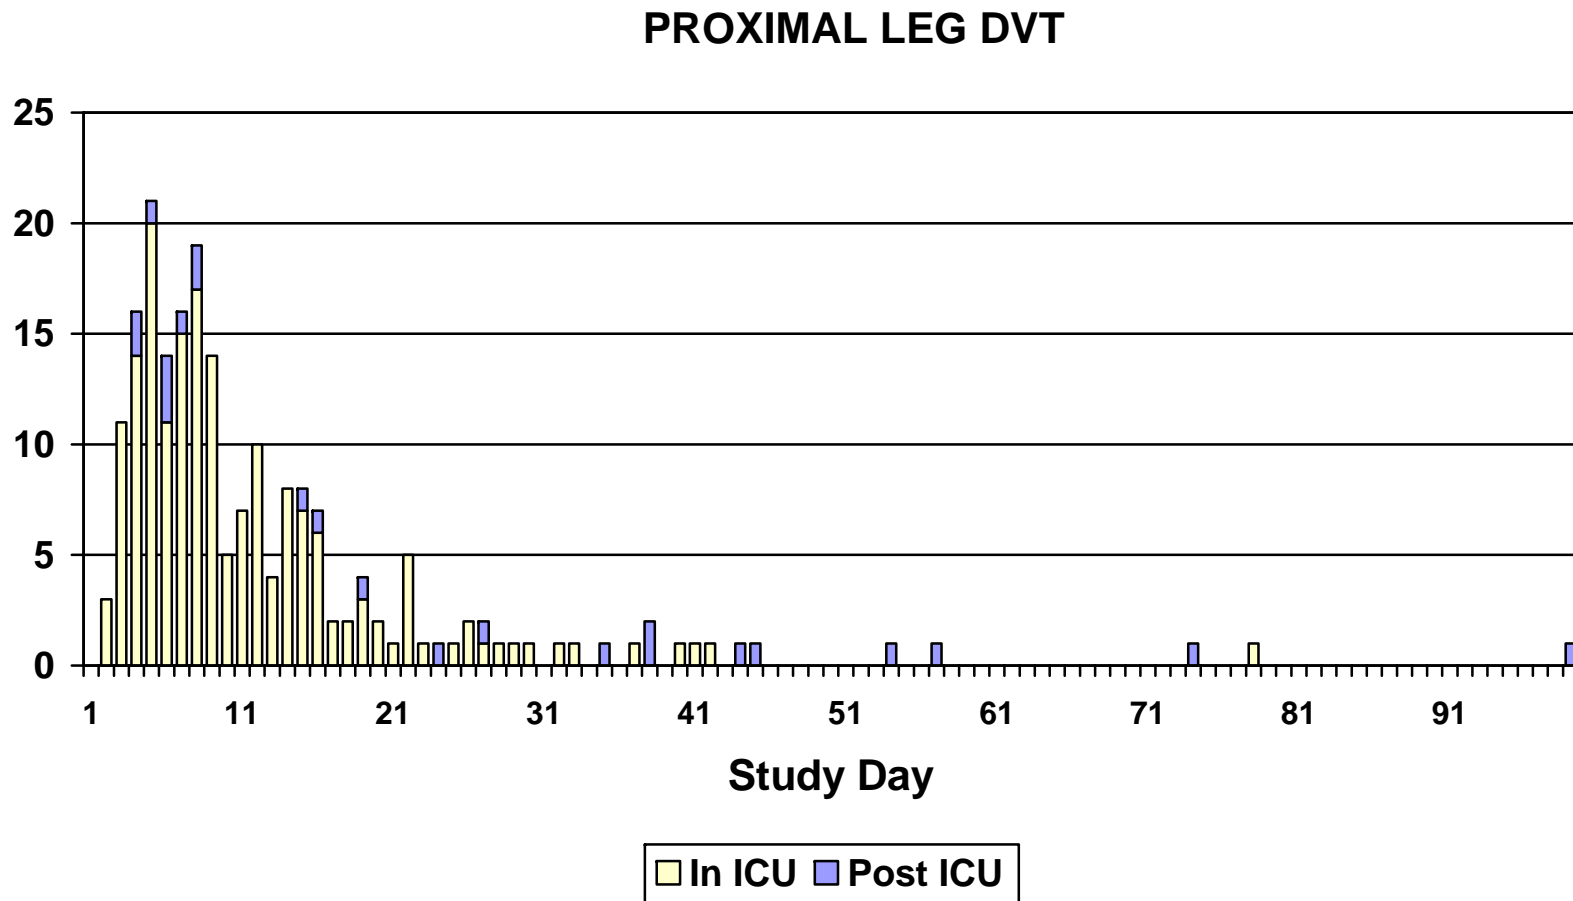

Appendix Figure 5.

This figure shows the numbers of pulmonary emboli diagnosed in the trial, by day from randomization.

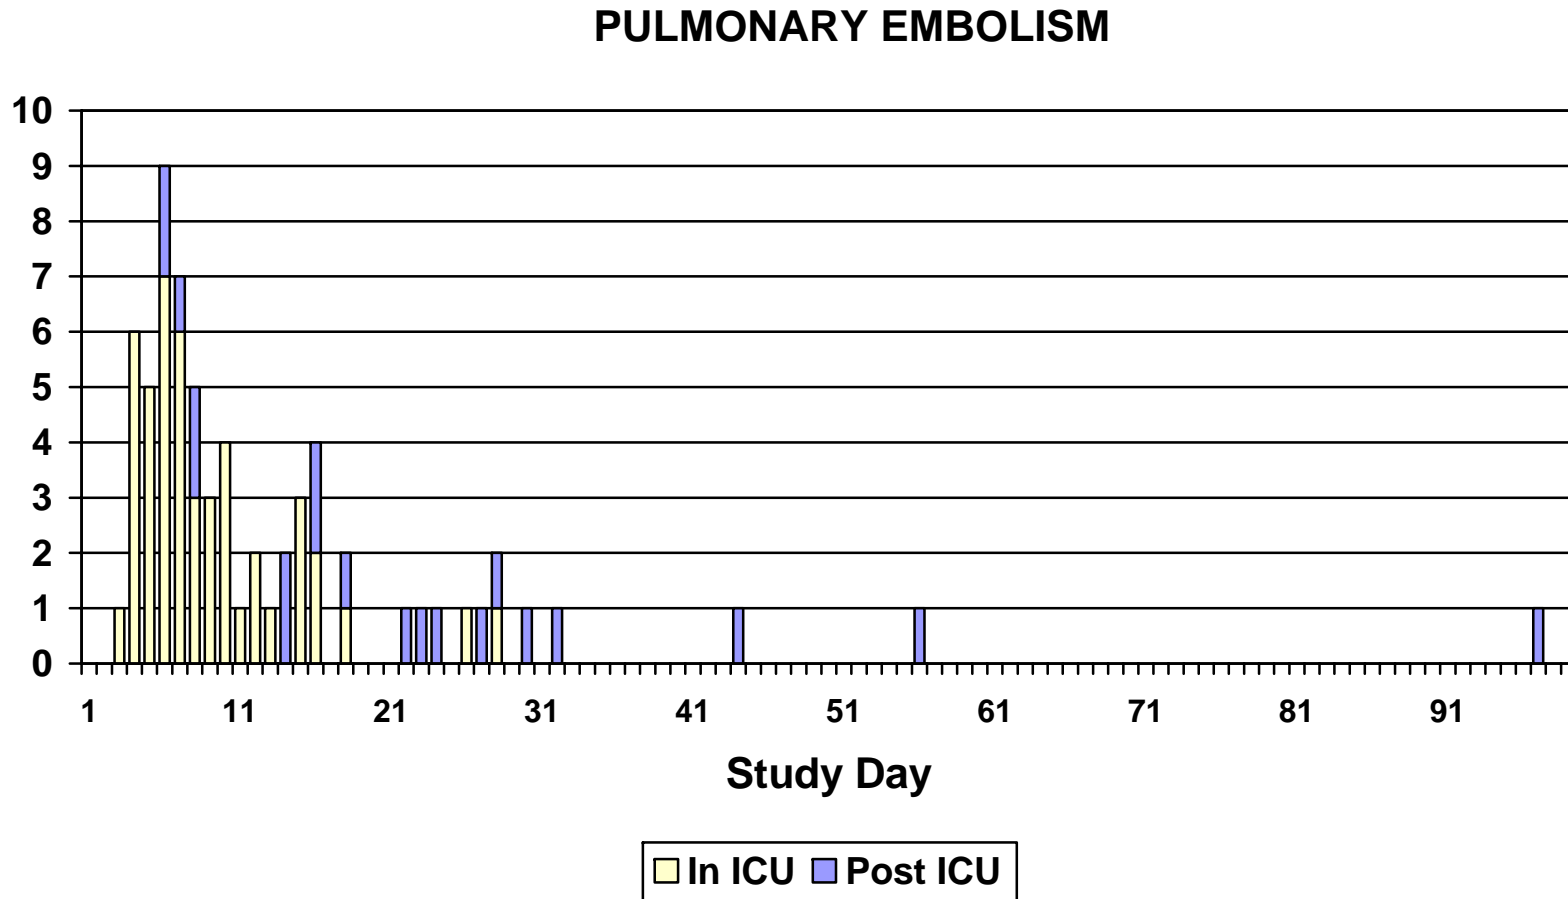

Appendix Figure 6.

This figure shows the numbers of venous thromboembolic events in the trial, by day from randomization.

### ANY VENOUS THROMBOEMBOLISM

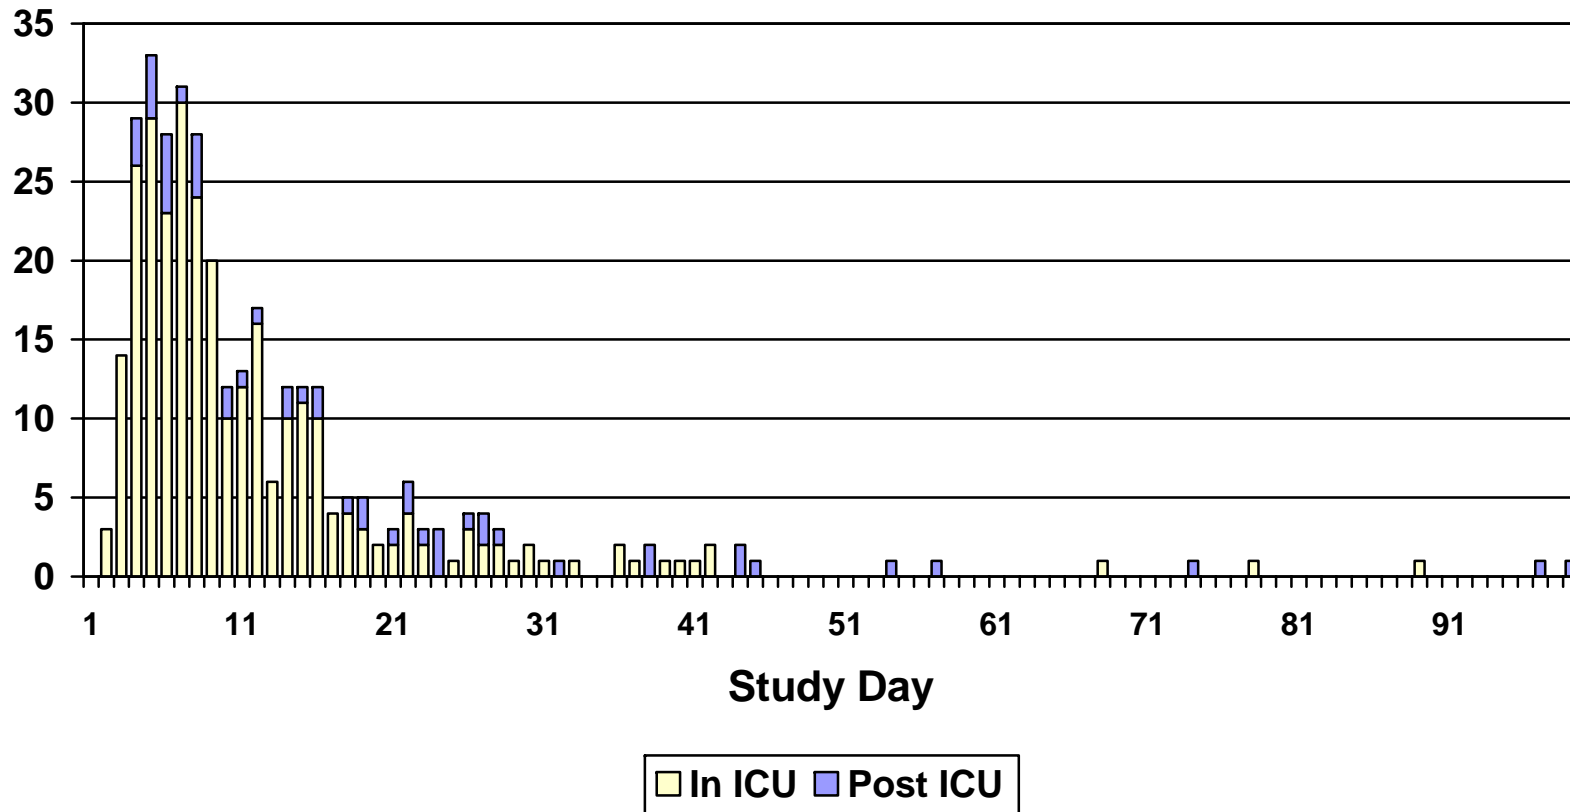

Supplement: nejmoa1014475_appendix.pdf [file nejmoa1014475_appendix.pdf]
